# Supplementary material for: Novel reversible and selective nerve agent simulant detection in conjunction with superoxide “turn-on” probing
Source: Royal Society of Chemistry journal article supplement (doi:10.1039/c3an02267f), 2014-01-01
Supplement: c3an02267f1.pdf [file c3an02267f1.pdf]

## Supporting Information

### Novel reversible and selective nerve agent simulant detection in conjunction with superoxide “turn-on” probing

Yoon Jeong Jang,<sup>a</sup> Dhiraj P. Murale,<sup>a</sup> David G. Churchill<sup>\*,a</sup>

E-mail: [dchurchill@kaist.ac.kr](mailto:dchurchill@kaist.ac.kr)

#### Experimentals

##### Materials and instruments

Fluorescein (Aldrich), diethyl chlorophosphate (Aldrich), diethyl cyanophosphonate (TCI) and diethyl methylphosphonate (Aldrich) are commercially available. Fluorescein was dissolved in pH 7.4 10 mM HEPES buffer and concentration was  $10^{-6}$  M (1) and 0.1 M of DCP, DECP and DEMP were dissolved in acetonitrile. Fluorescence measurements were carried out with a Shimadzu RF-5301pc spectrofluorophotometer slit width Ex, E<sub>m</sub> = 1.5 and 3. All solvents used in NMR spectral analyses were purchased commercially and were of spectroscopy grade. <sup>1</sup>H, <sup>13</sup>C and <sup>31</sup>P NMR spectra were measured on Bruker Avance 400 MHz spectrometer. High-resolution MALDI-TOF mass spectrometry was performed on an Applied Biosystem Voyager 4394 (Ionization method, N<sub>2</sub> laser (337 nm, 3 ns pulse): analyzer 2.0 m linear mode; 3.0 reflector mode)

##### Synthetic procedure

Compound **1** (for only Mass spectrum)

Fluorescein (200 mg, 0.602 mmol) and 1,4-diazabicyclo[2,2,2]octane (135.05 mg, 1.204 mmol) were dissolved in 15 mL of dry DMF in round bottom flask under inert atmosphere of argon for 15 min. Then, DCP (0.174 mL, 1.204 mmol) was added and the reaction was continued at room temperature for 13 hr. The reaction was quenched by 150 mL of water and kept in refrigerator overnight. After the mixture was filtered and washed twice by water and dried to get a yellow powder (184.5 mg, 50.70%)

# Results

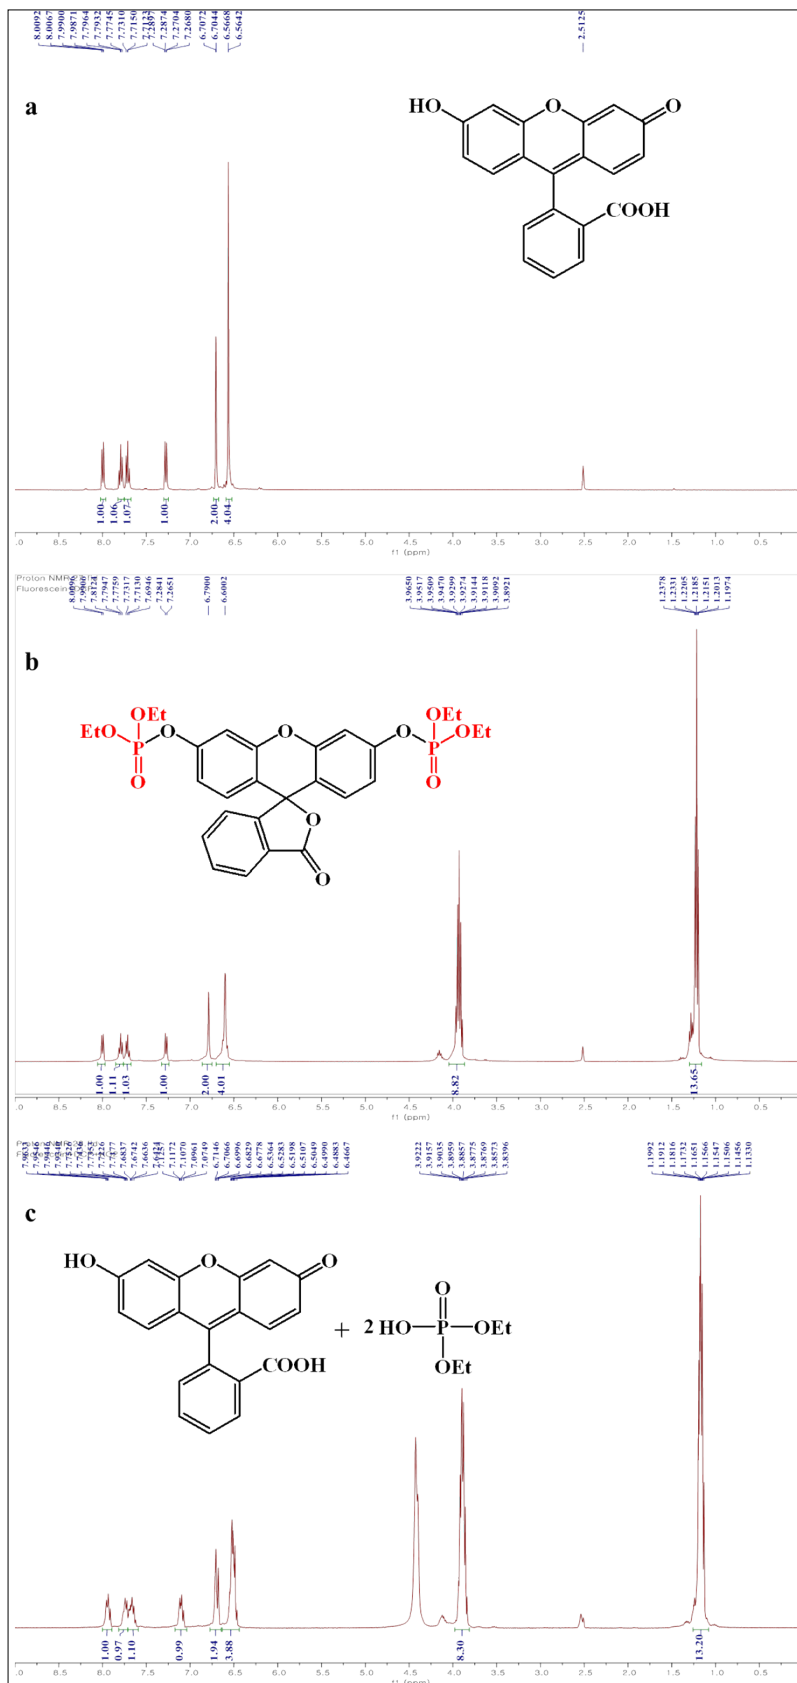

**Fig. S1.**  $^1\text{H}$  NMR spectra of fluorescein in DMSO- $d_6$  (a), compound **1** (b), and compound **1** and  $\text{KO}_2$  (c)

(a)  $^1\text{H}$  NMR (400 MHz, DMSO- $d_6$ : 2.51 ppm)  $\delta$  8.00 (dd,  $^3J_{\text{H-H}} = 7.68$  Hz,  $^4J_{\text{H-H}} = 1.00$  Hz, 1H, H<sub>9</sub>), 7.79 (m, 1H, H<sub>5</sub>), 7.71 (m, 1H, H<sub>6</sub>), 7.28 (dd,  $^3J_{\text{H-H}} = 7.72$  Hz,  $^4J_{\text{H-H}} = 0.92$  Hz, 1H, H<sub>10</sub>), 6.71 (s, 2H, H<sub>13</sub>), 6.56 (s, 4H, H<sub>7,11</sub>)

(b)  $^1\text{H}$  NMR (400 MHz, DMSO- $d_6$ : 2.51 ppm)  $\delta$  8.00 (d,  $^3J_{\text{H-H}} = 7.60$  Hz, 1H, H<sub>9</sub>), 7.79 (t,  $^3J_{\text{H-H}} = 7.08$  Hz, 1H, H<sub>5</sub>), 7.71 (t,  $^3J_{\text{H-H}} = 7.48$  Hz, 1H, H<sub>6</sub>), 7.27 (d,  $^3J_{\text{H-H}} = 7.6$ , 1H, H<sub>10</sub>), 6.79 (s, 2H, H<sub>13</sub>), 6.60 (s, 4H, H<sub>7,11</sub>) 3.97–3.89 (m, 8H, H<sub>15,16</sub>), 1.24–1.20 (m, 12H, H<sub>17,18</sub>),

(c)  $^1\text{H}$  NMR (400 MHz, DMSO- $d_6$  2.52 and D<sub>2</sub>O 4.43 ppm)  $\delta$  7.96–7.91 (m, 1H, H<sub>9</sub>), 7.76–7.64 (m, 1H, H<sub>5</sub>), 7.70–7.64 (m, 1H, H<sub>6</sub>), 7.13–7.07 (m, 1H, H<sub>10</sub>), 6.71–6.68 (m, 2H, H<sub>13</sub>), 6.54–6.47 (m, 4H, H<sub>7,11</sub>) 3.97–3.89 (m, 8 H, H<sub>15,16</sub>), 1.24–1.20 (m, 12H, H<sub>17,18</sub>)

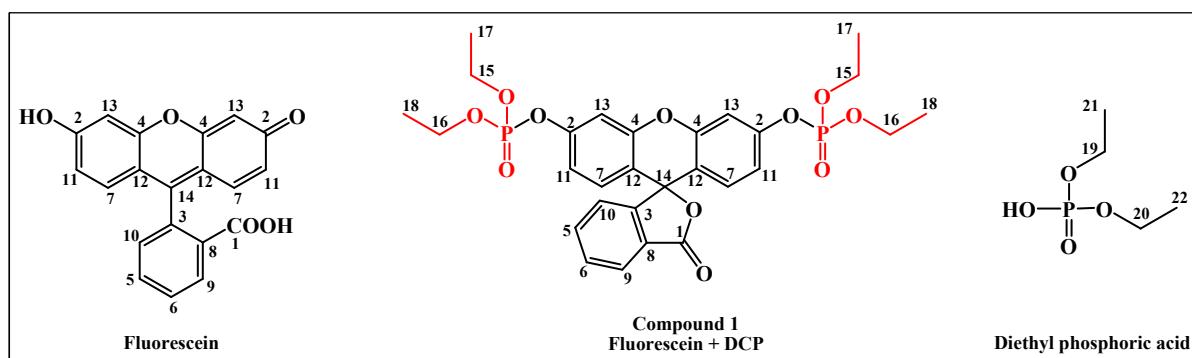

Diagram of fluorescein, compound **1**, and diethyl phosphoric acid

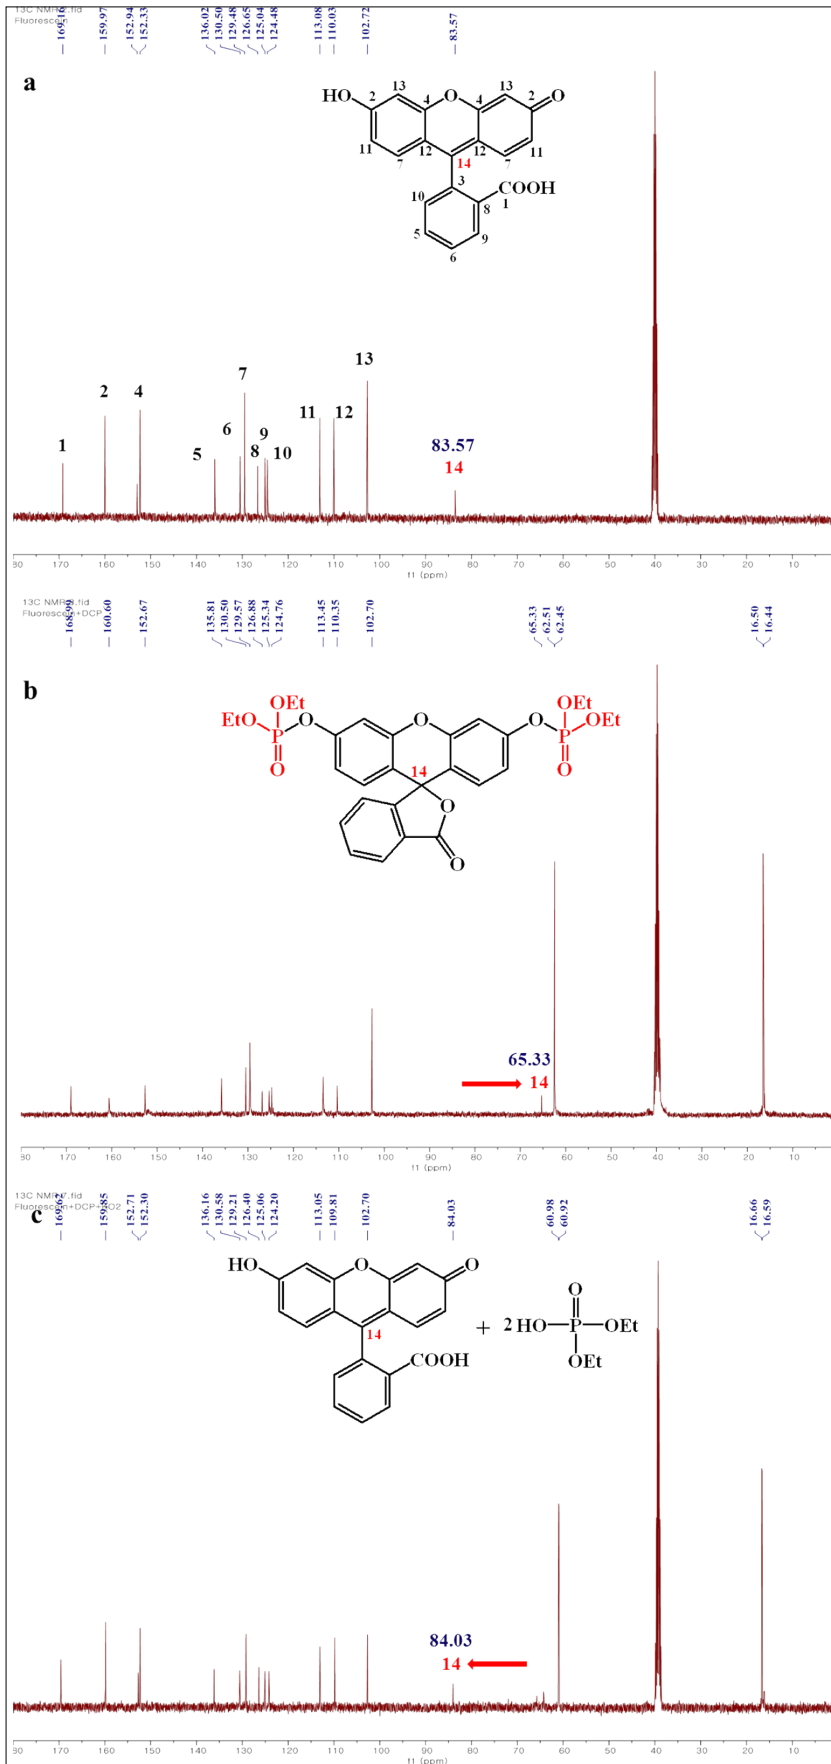

**Fig. S2.**  $^{13}\text{C}$  NMR spectra of fluorescein (a), compound **1** (b), and compound **1** and  $\text{KO}_2$  (c)

(a)  $^{13}\text{C}$  NMR (100 MHz,  $\text{DMSO-d}_6$ : 3.97 ppm)  $\delta$  169.2 ( $\text{C}_1$ ), 160.0 ( $\text{C}_2$ ), 152.9 ( $\text{C}_3$ ), 152.3 ( $\text{C}_4$ ), 136.0 ( $\text{C}_5$ ), 130.5 ( $\text{C}_6$ ), 129.5 ( $\text{C}_7$ ), 126.7 ( $\text{C}_8$ ), 125.0 ( $\text{C}_9$ ), 124.5 ( $\text{C}_{10}$ ), 113.1 ( $\text{C}_{11}$ ), 110.0 ( $\text{C}_{12}$ ), 102.7 ( $\text{C}_{13}$ ), 83.6 ( $\text{C}_{14}$ )

(b)  $^{13}\text{C}$  NMR (100 MHz,  $\text{DMSO-d}_6$ : 3.97 ppm)  $\delta$  169.0 ( $\text{C}_1$ ), 160.6 ( $\text{C}_2$ ), 152.7 ( $\text{C}_3$ ), 135.8 ( $\text{C}_5$ ), 130.5 ( $\text{C}_6$ ), 129.6 ( $\text{C}_7$ ), 126.9 ( $\text{C}_8$ ), 125.3 ( $\text{C}_9$ ), 124.8 ( $\text{C}_{10}$ ), 113.4 ( $\text{C}_{11}$ ), 110.4 ( $\text{C}_{12}$ ), 102.7 ( $\text{C}_{13}$ ), 65.3 ( $\text{C}_{14}$ ), 62.5 ( $\text{C}_{15}$ ), 62.5 ( $\text{C}_{16}$ ), 16.5 ( $\text{C}_{17}$ ), 16.5 ( $\text{C}_{18}$ )

(c)  $^{13}\text{C}$  NMR (100 MHz,  $\text{DMSO-d}_6$  and  $\text{D}_2\text{O}$ : 3.97 ppm)  $\delta$  169.6 ( $\text{C}_1$ ), 159.9 ( $\text{C}_2$ ), 152.7 ( $\text{C}_3$ ), 152.3 ( $\text{C}_4$ ), 136.2 ( $\text{C}_5$ ), 130.6 ( $\text{C}_6$ ), 129.2 ( $\text{C}_7$ ), 126.4 ( $\text{C}_8$ ), 125.1 ( $\text{C}_9$ ), 124.2 ( $\text{C}_{10}$ ), 113.1 ( $\text{C}_{11}$ ), 109.8 ( $\text{C}_{12}$ ), 102.7 ( $\text{C}_{13}$ ), 84.0 ( $\text{C}_{14}$ ), 61.0 ( $\text{C}_{19}$ ), 60.9 ( $\text{C}_{20}$ ), 16.7 ( $\text{C}_{21}$ ), 16.6 ( $\text{C}_{22}$ )

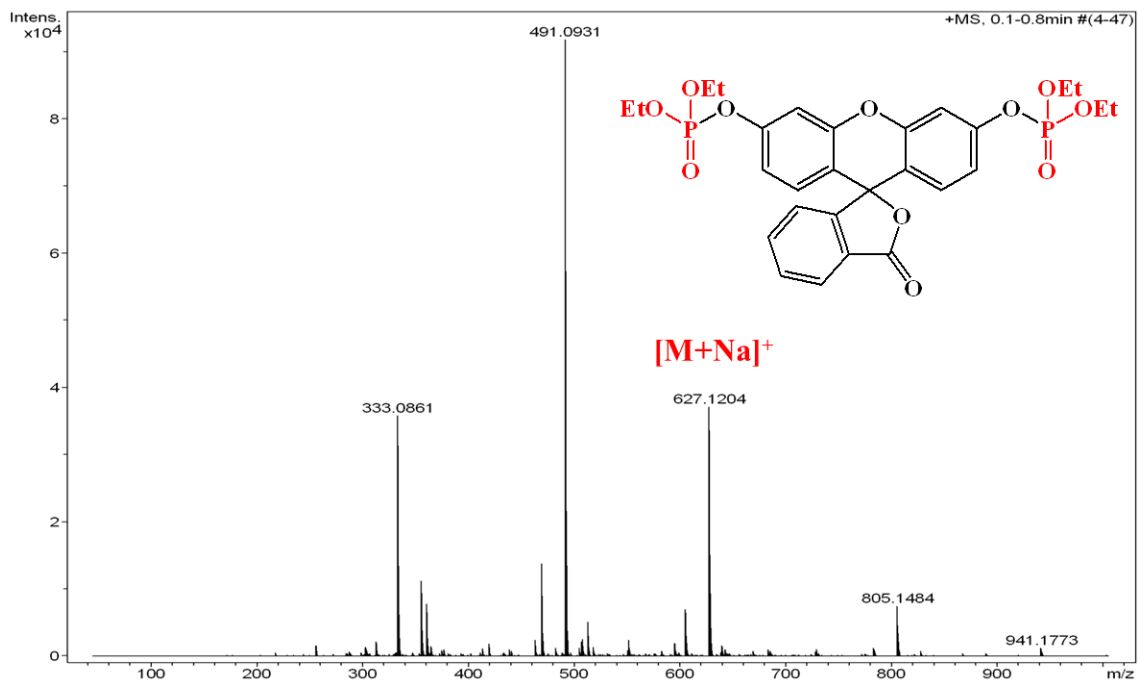

**Fig. S3.** HR-MS spectra of compound **1** was observed at 627.1204 and calculated for  $C_{28}H_{30}O_{11}P_2Na^+$  is 627.1156)

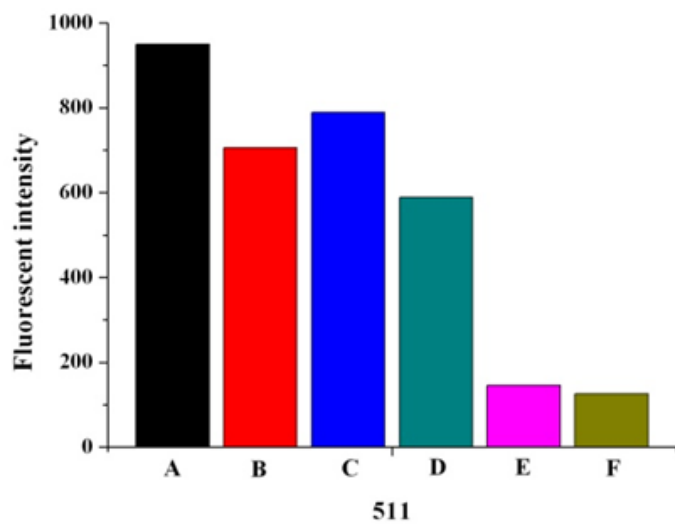

**Fig. S4:** Relative fluorescence intensity of compound **1** ( $\lambda_{\text{exc}} = 490 \text{ nm}$ ,  $\lambda_{\text{emis}} = 511 \text{ nm}$ ). **A**  $\text{KO}_2$ , **B**  $\text{KO}_2 + \text{H}_2\text{O}_2$ , **C**  $\text{KO}_2 + \text{TBHP}$ , **D**  $\text{KO}_2 + \text{NaOCl}$ , **E**  $\text{KO}_2 + \text{OH}^-$ , **F**  $\text{KO}_2 + \text{OtBu}^-$ .

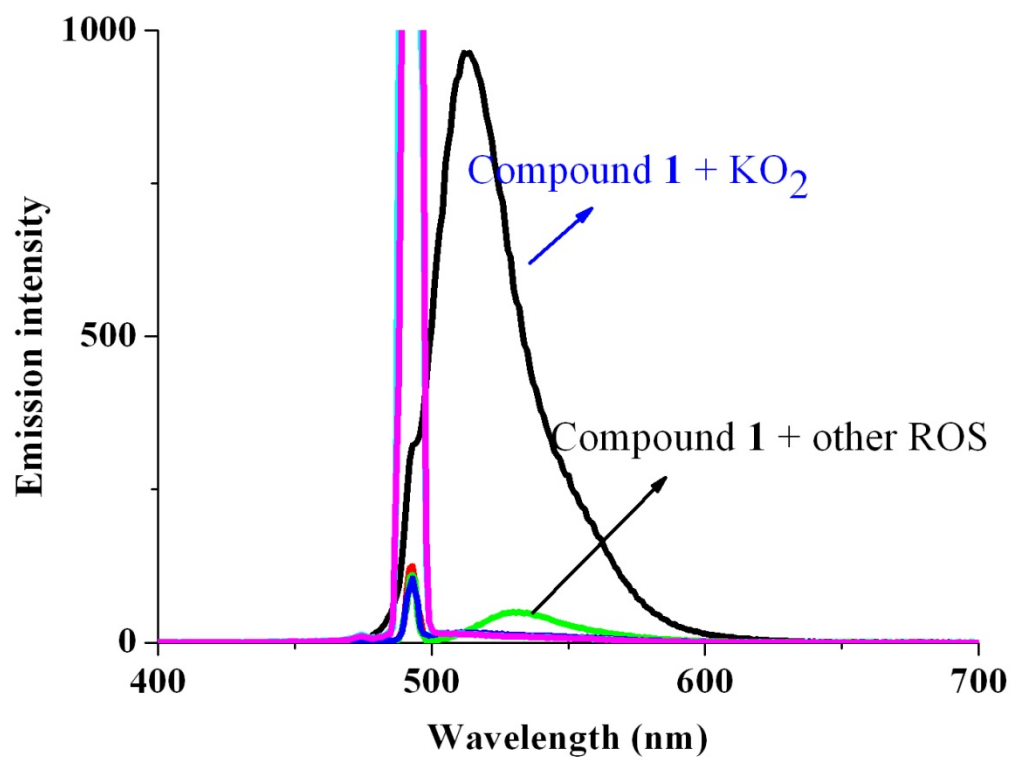

**Fig. S5.** Relative fluorescence intensity of compound **1** with ROS (3300  $\mu\text{M}$  of  $\text{KO}_2$ ,  $\text{H}_2\text{O}_2$ , TBHP,  $\text{NaOCl}$ ,  $\text{OH}^\cdot$ ,  $\text{OtBu}^\cdot$  in HEPES buffer; 10 mM, pH 7.4  $\lambda_{\text{exc}} = 490$  nm,  $\lambda_{\text{emis}} = 511$  nm, slit width = 3).



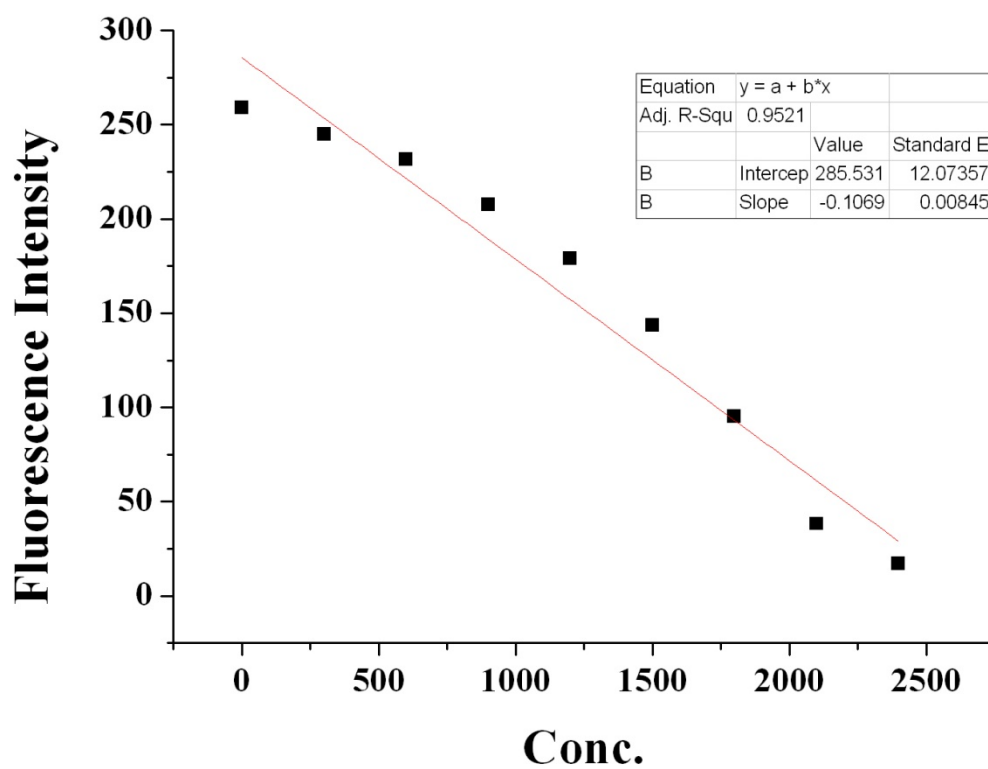

**Fig. S6.** Emission spectra change of **compound 1** as a function of concentration DCP (0 – 3600  $\mu\text{M}$ ) in HEPES buffer; 10 mM, pH 7.4). Each spectrum was recorded at real time

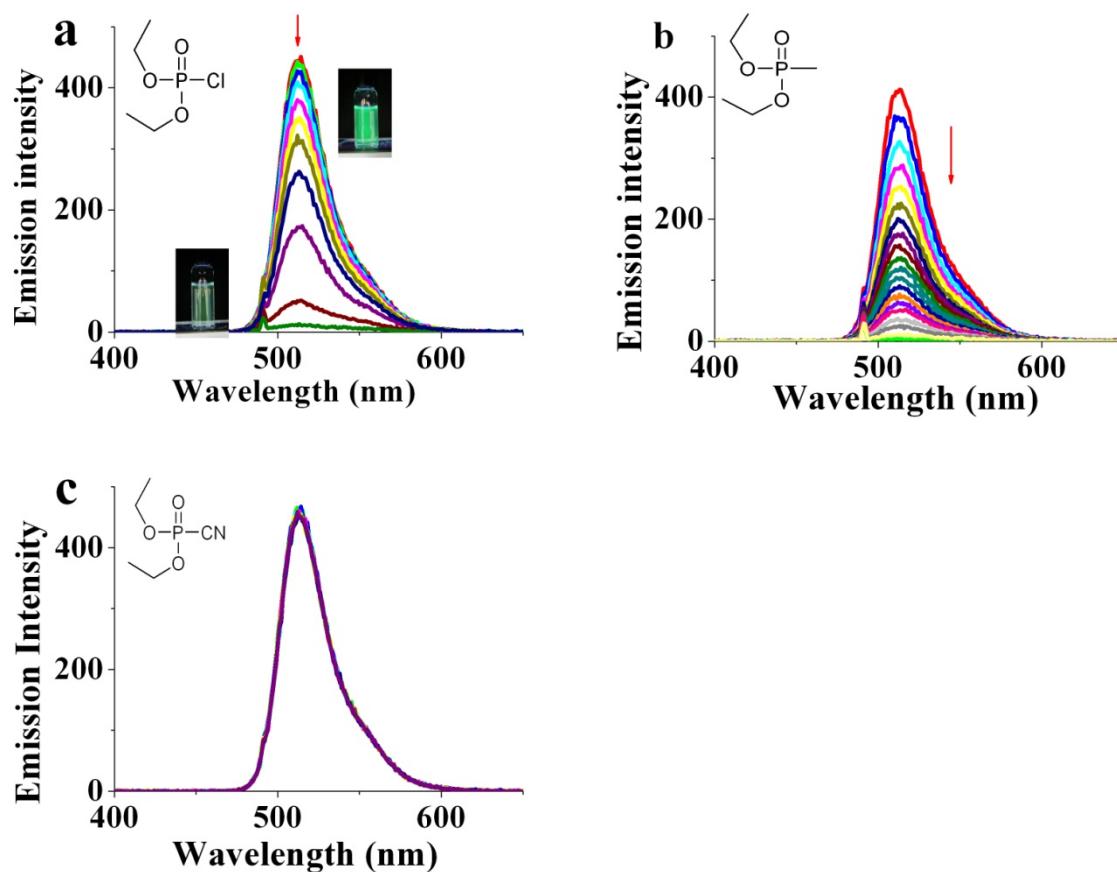

**Fig. S7** Emission titration spectra of fluorescein (10<sup>-6</sup> M, HEPES buffer; 10 mM, pH 7.4) with (a) DCP (0 to 3300 μM), (b) DEMP (0 to 6600 μM), and (c) DECP (0 to 3000 μM) in acetonitrile  $\lambda_{\text{exc}} = 490$  nm,  $\lambda_{\text{emis}} = 511$  nm (slit width = 1.5)

| <b>Nerve agent</b> | <b>LC<sub>t50</sub><br/>Inhalation<br/>mg·min/m<sup>3</sup></b> | <b>LD<sub>50</sub><br/>Skin<br/>mg/individual</b> |
|--------------------|-----------------------------------------------------------------|---------------------------------------------------|
| <b>GA</b>          | <b>200</b>                                                      | <b>4000</b>                                       |
| <b>GB</b>          | <b>100</b>                                                      | <b>1700</b>                                       |
| <b>GD</b>          | <b>100</b>                                                      | <b>30</b>                                         |
| <b>VX</b>          | <b>50</b>                                                       | <b>10</b>                                         |

**Table. S1** Lethal concentration & time and lethal dose of GA, GB, GD and VX<sup>1</sup>

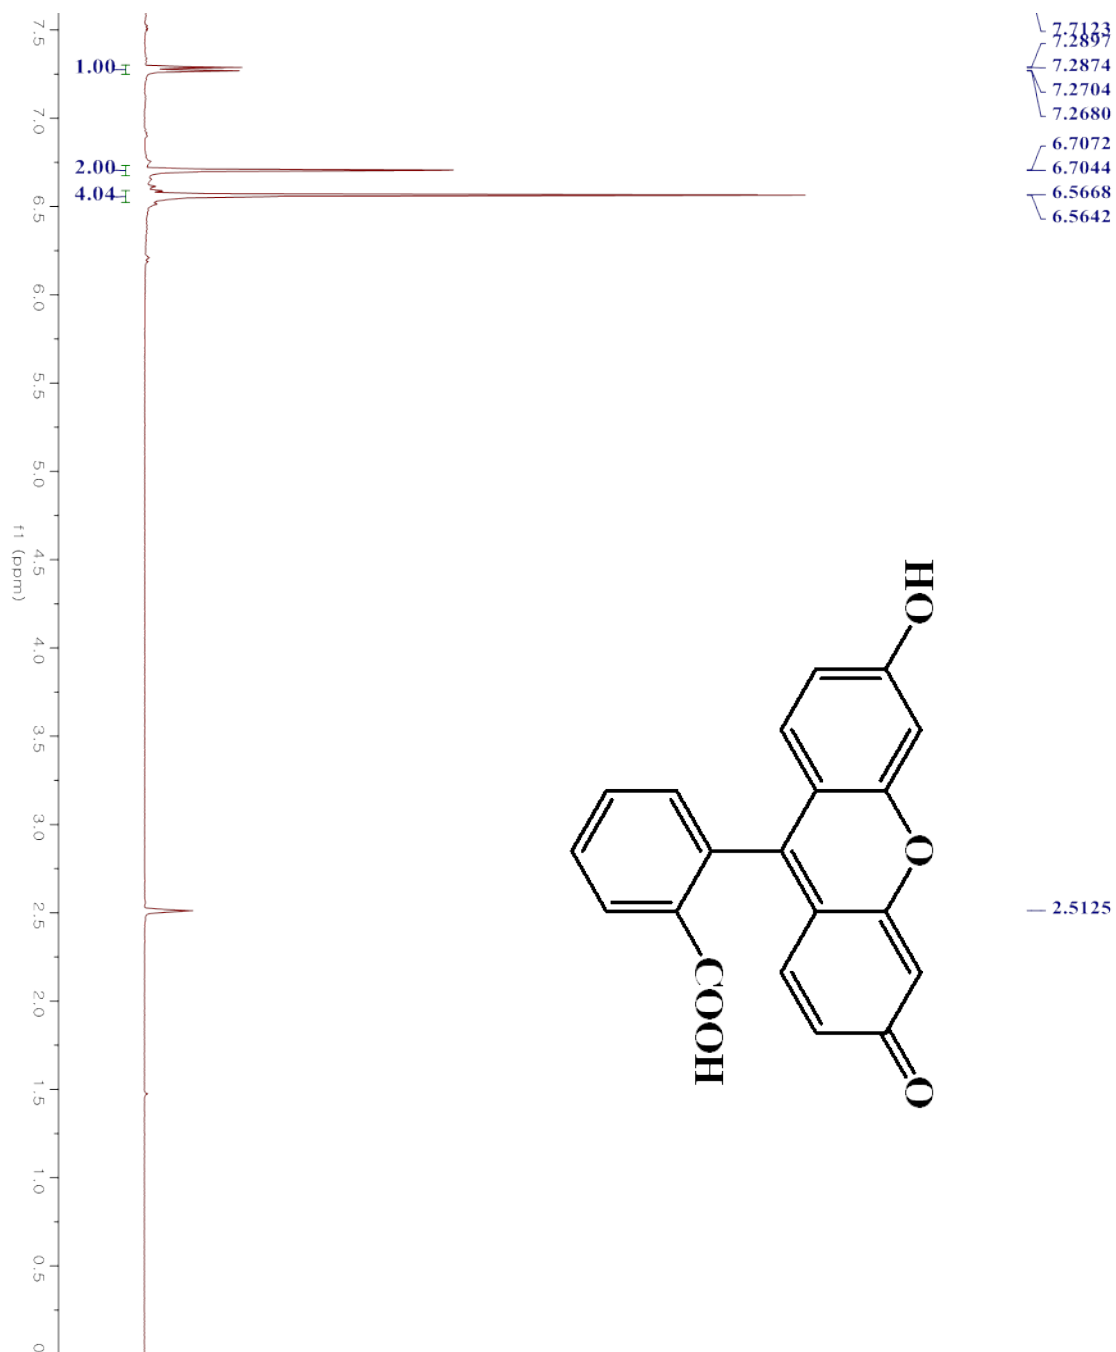

Fig. S8. <sup>1</sup>H NMR spectrum of fluorescein in DMSO-d<sub>6</sub>

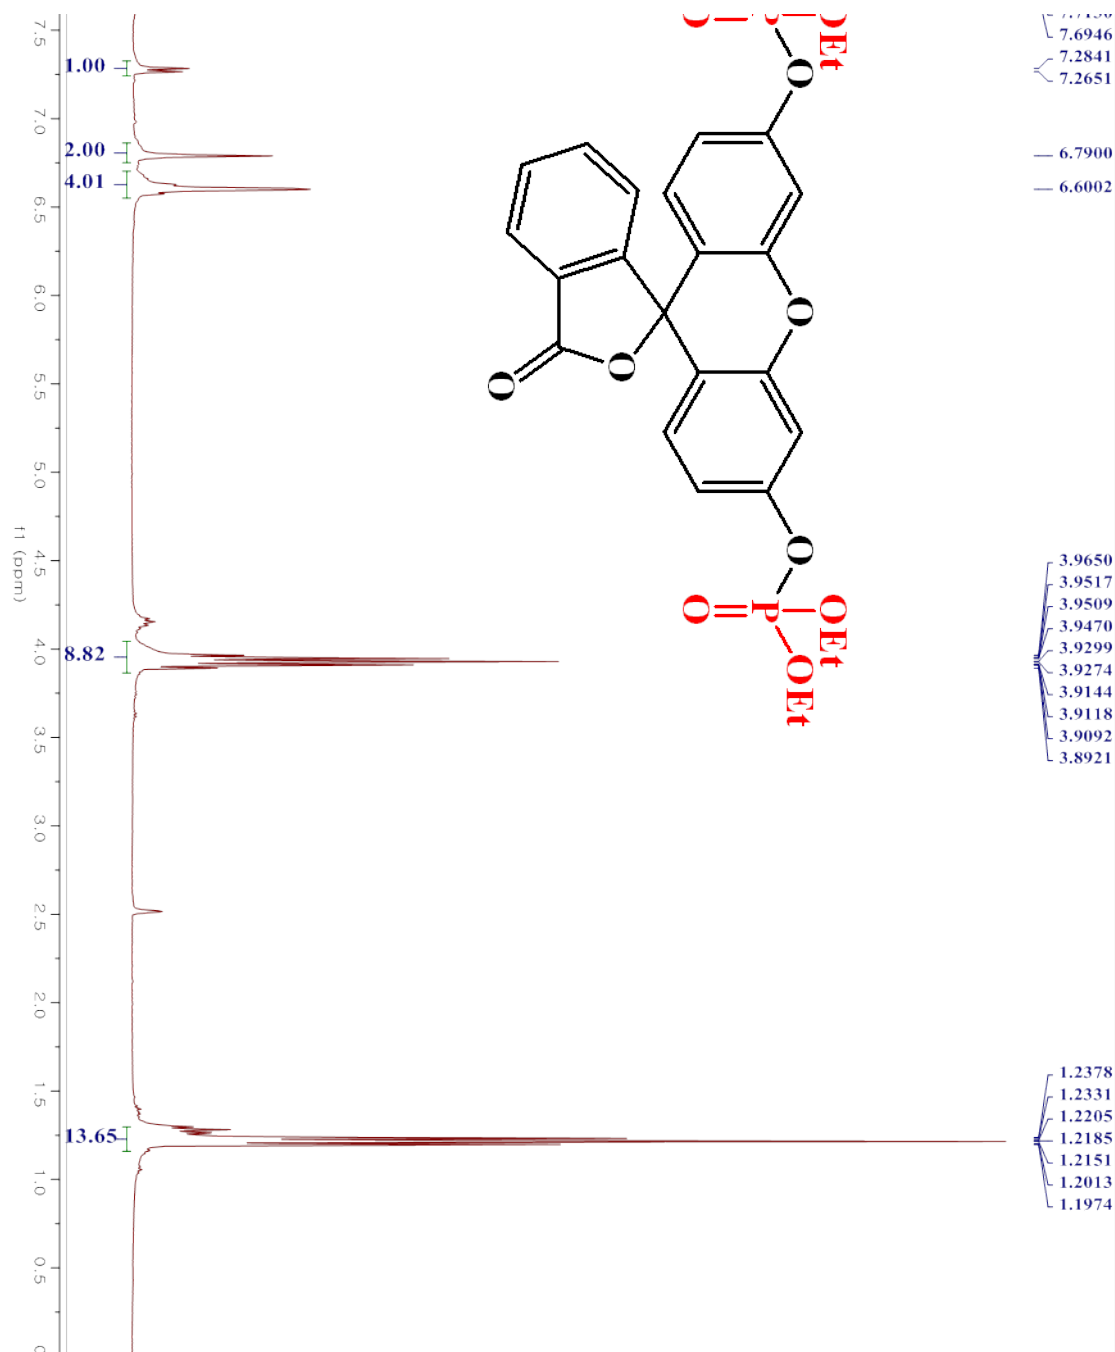

Fig. S9.  $^1\text{H}$  NMR spectrum of compound **1** in  $\text{DMSO-d}_6$

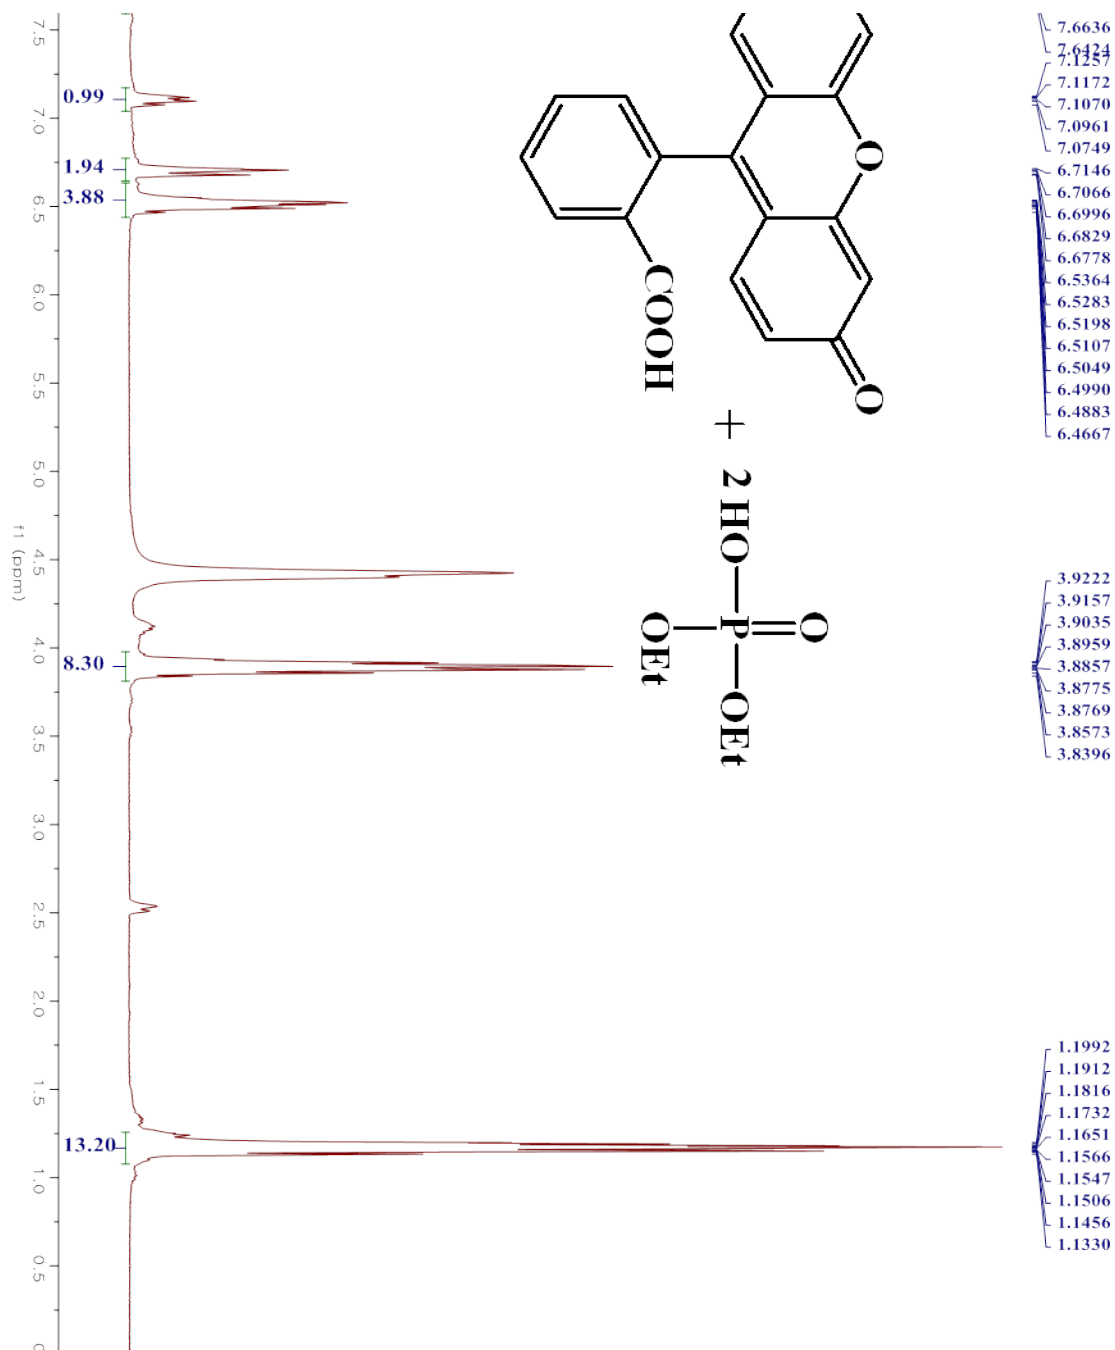

**Fig. S10.** <sup>1</sup>H NMR spectrum of compound 1 and KO<sub>2</sub> in DMSO-d<sub>6</sub> and D<sub>2</sub>O

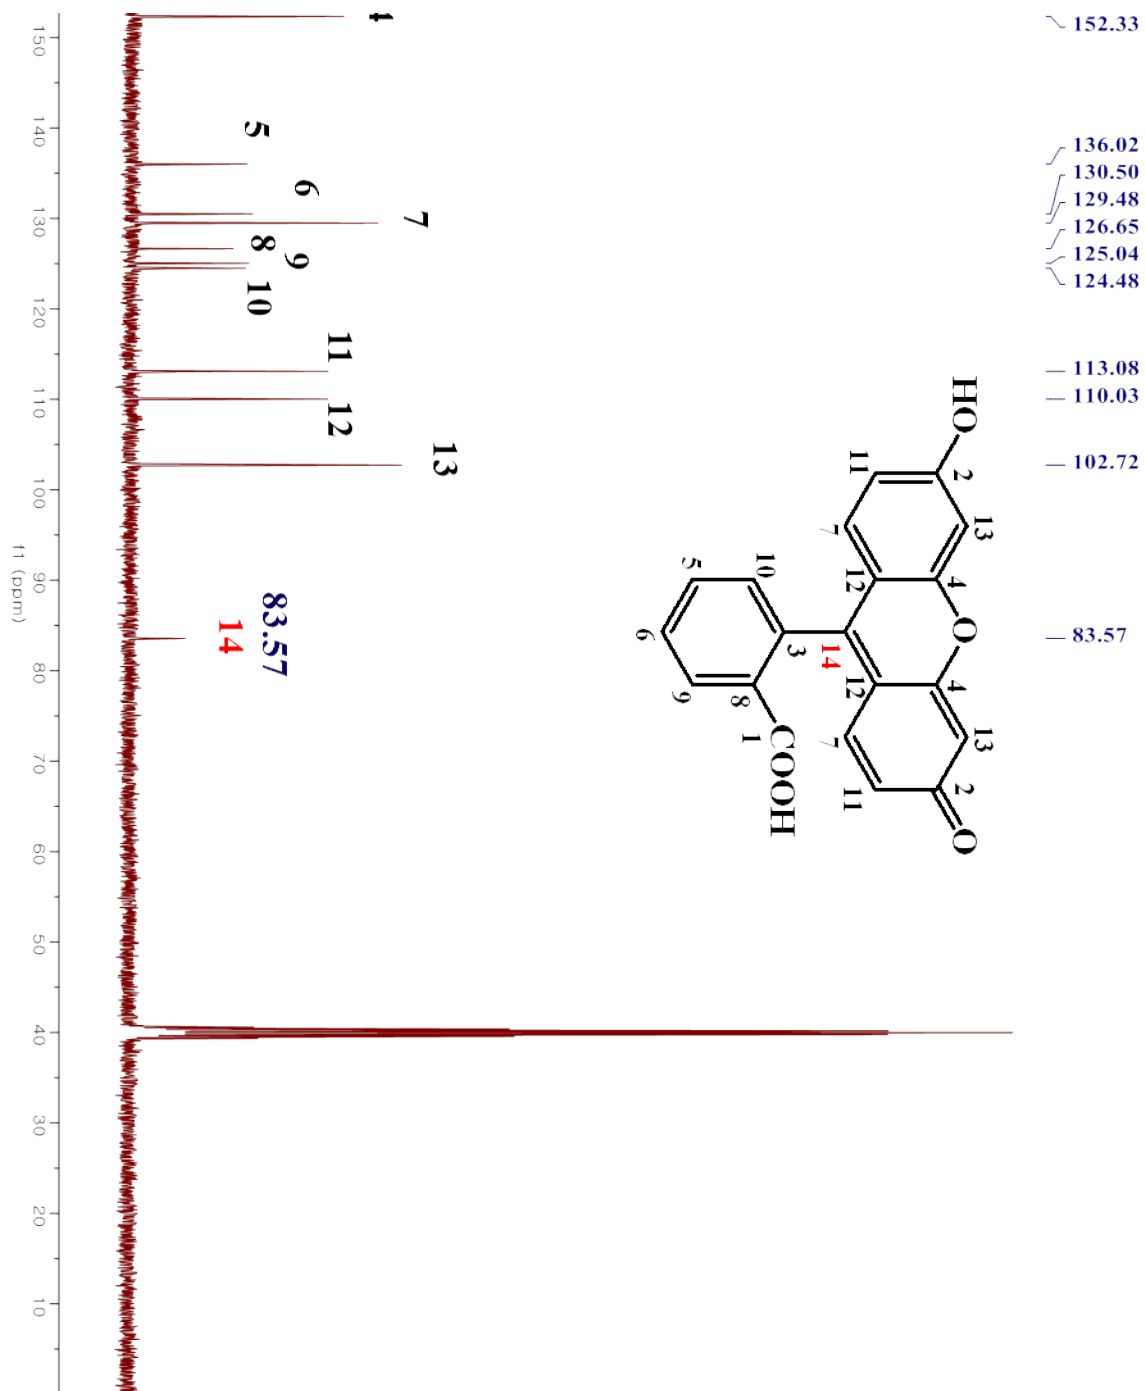

Fig. S11. <sup>13</sup>C NMR spectrum of fluorescein in DMSO-d<sub>6</sub>

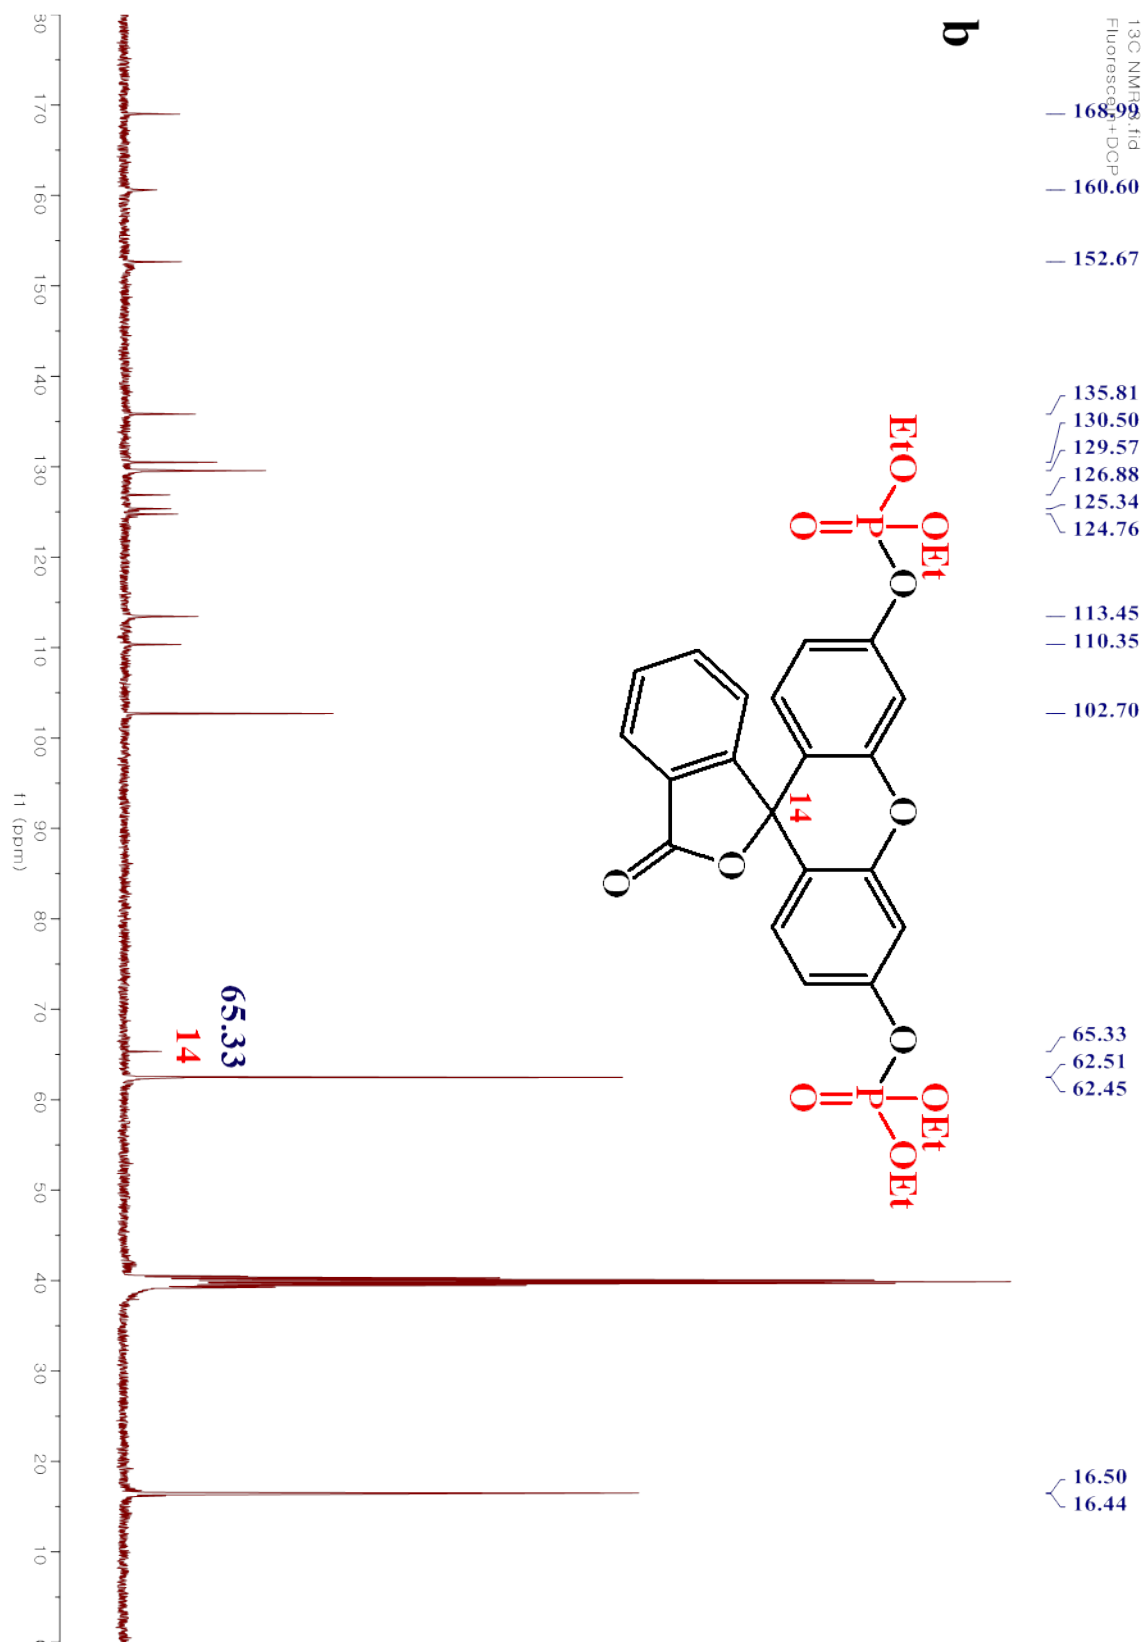

**Fig. S12.** <sup>13</sup>C NMR spectra of compound **1** in DMSO-d<sub>6</sub>



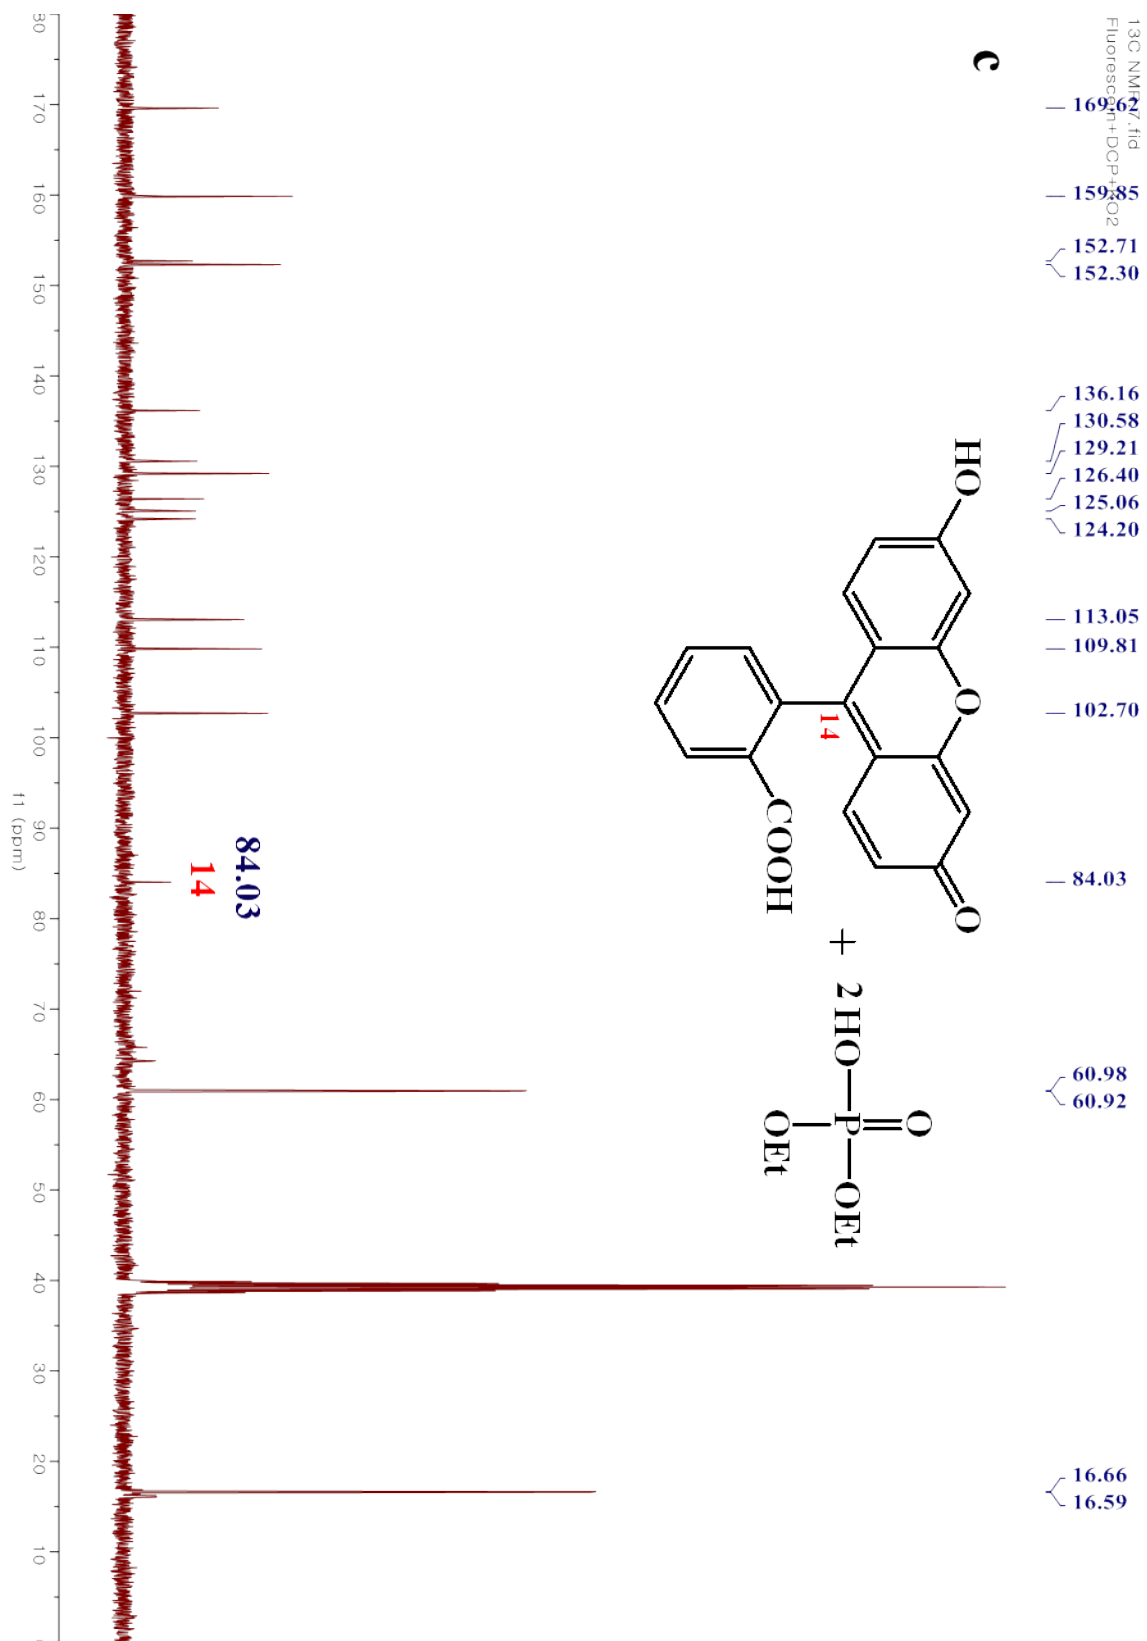

**Fig. S13.** <sup>13</sup>C NMR spectrum of compound **1** and KO<sub>2</sub> in DMSO-d<sub>6</sub> and D<sub>2</sub>O

<sup>31</sup>P NMR/2  
DCP

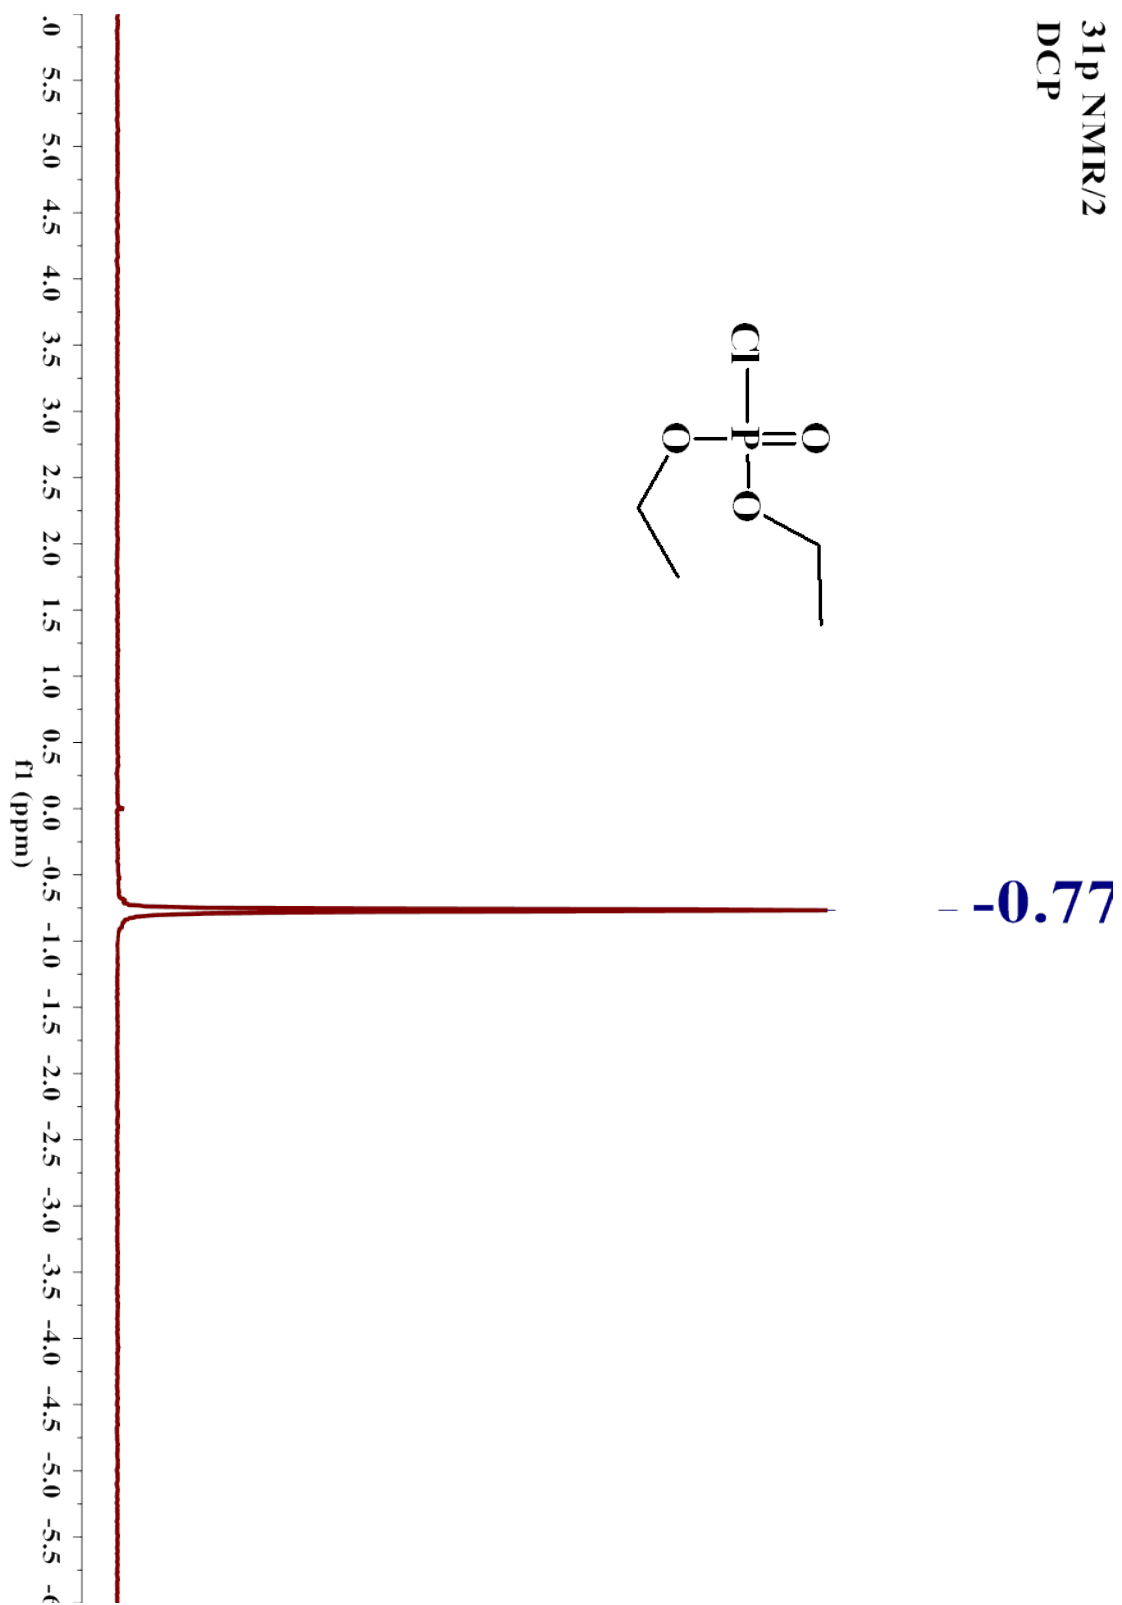

Fig. S14. <sup>31</sup>P NMR spectrum of fluorescein in DMSO-d<sub>6</sub>

3.99

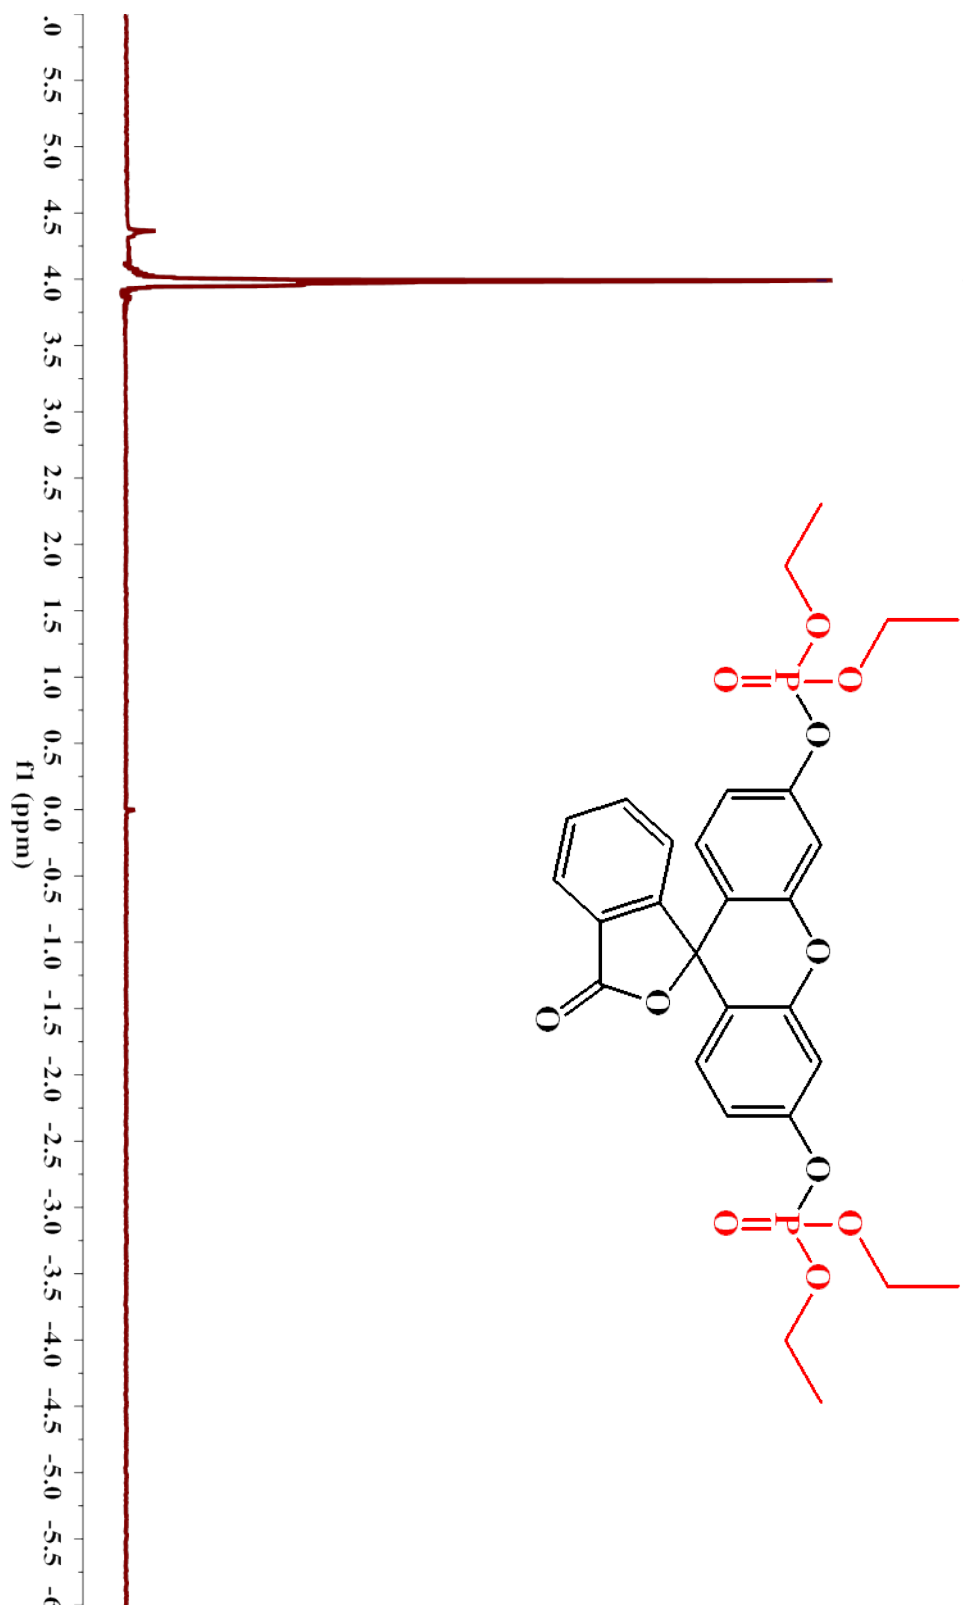

Fig. S15.  $^{31}\text{P}$  NMR spectrum of compound 1 in  $\text{DMSO-d}_6$

**<sup>31</sup>P NMR/4  
DCP+FL+KO<sub>2</sub>**

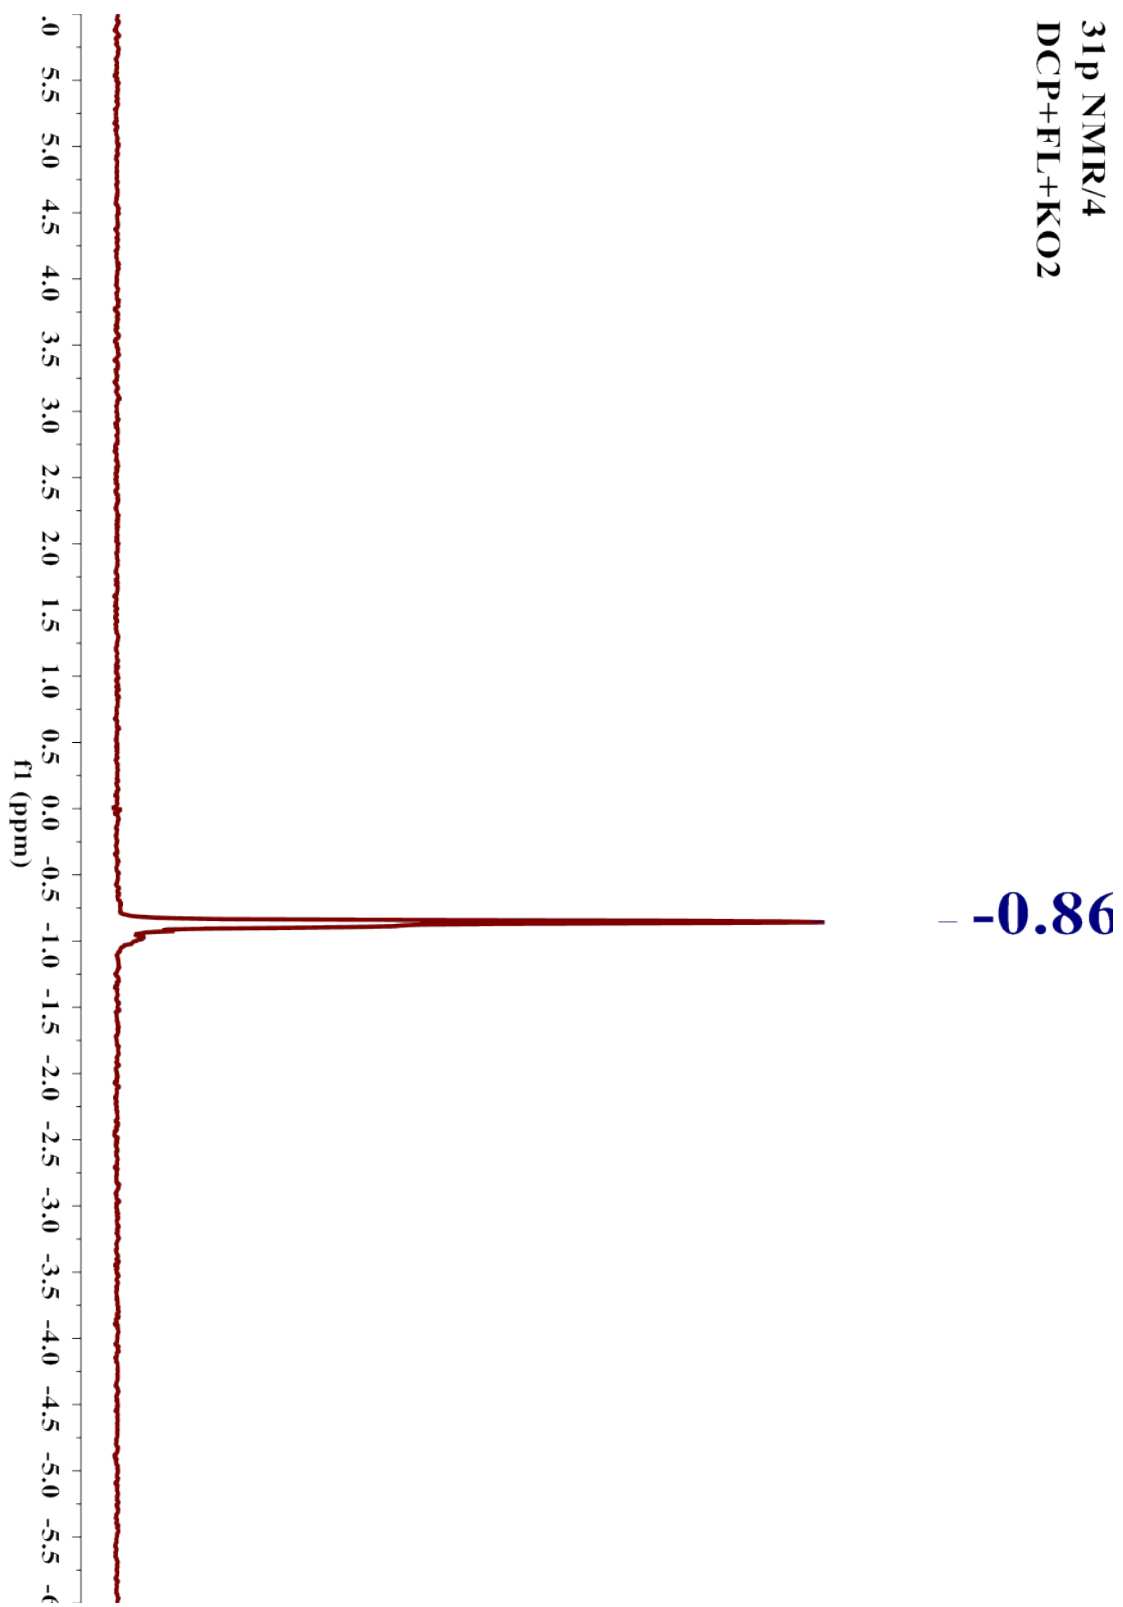

**Fig. S16.** <sup>31</sup>P NMR spectrum of compound **1** and KO<sub>2</sub> in DMSO-d<sub>6</sub> and D<sub>2</sub>O

## Reference

1. O. A. Sadik, W. H. Land, Jr. and J. Wang, *Electroanalysis*, 2003, **15**, 1149
